# Supplementary material
Source: PubMed Central journal article supplement (PMC2224183)

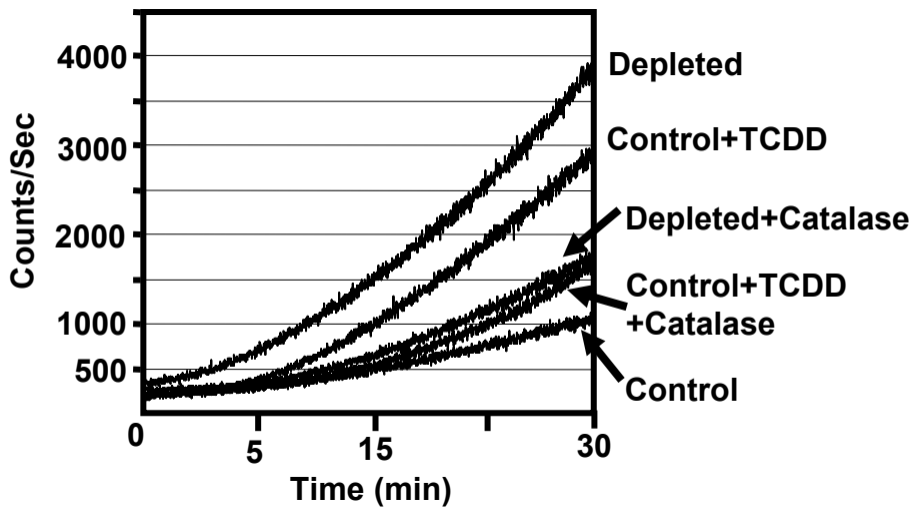

Supplement: pnas_0706183104_1.pdf [file pnas_0706183104_1.pdf]

**A**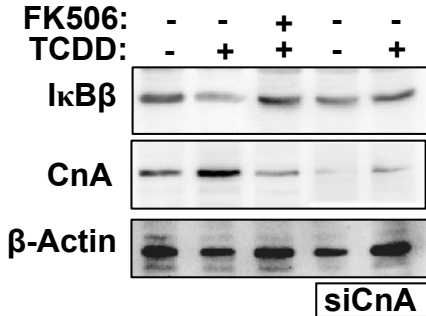**B**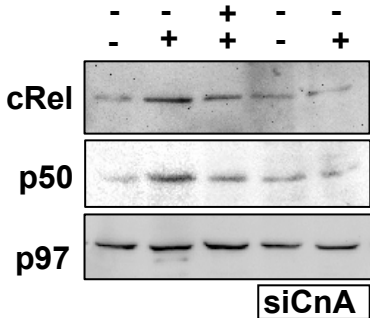

Supplement: pnas_0706183104_2.pdf [file pnas_0706183104_2.pdf]

**A**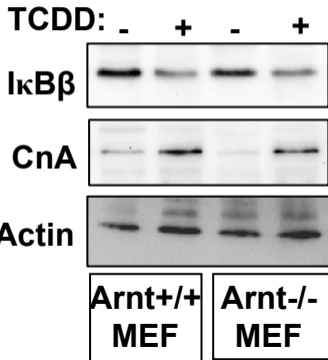**B**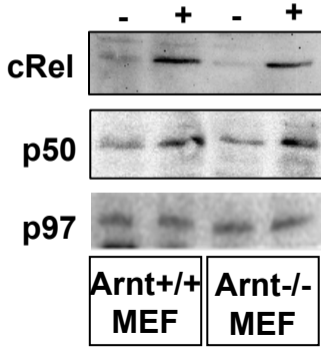

Supplement: pnas_0706183104_3.pdf [file pnas_0706183104_3.pdf]
